# Supplementary material for: A thermodynamic relationship and phase transition study involving two polymorphs of sulfamethoxazole: form I vs. form II
Source: Royal Society of Chemistry journal article supplement (doi:10.1039/d1nj03597e), 2021-01-01
Supplement: d1nj03597e1.pdf [file d1nj03597e1.pdf]

## Thermodynamic Relationship and Phase Transition Study involving two Polymorphs of Sulfamethoxazole: Form I vs. Form II

Carlos Henrique de Moura Oliveira<sup>1</sup>, Jennifer Tavares Jacon Freitas<sup>1,2</sup>, Iara Maria Landre Rosa<sup>1</sup>, Antônio Carlos Doriguetto<sup>1\*</sup>

<sup>1</sup>Laboratório de Cristalografia, Instituto de Química, Universidade Federal de Alfenas, Alfenas, Minas Gerais, 37130-001, Brazil

<sup>2</sup>Núcleo de Controle e Qualidade, Faculdade de Ciências Farmacêuticas, Alfenas, Minas Gerais, 37130-001, Brazil.

\*Author for correspondence: Dr. Antônio Carlos Doriguetto  
(e-mail:doriguetto@unifal-mg.edu.br)

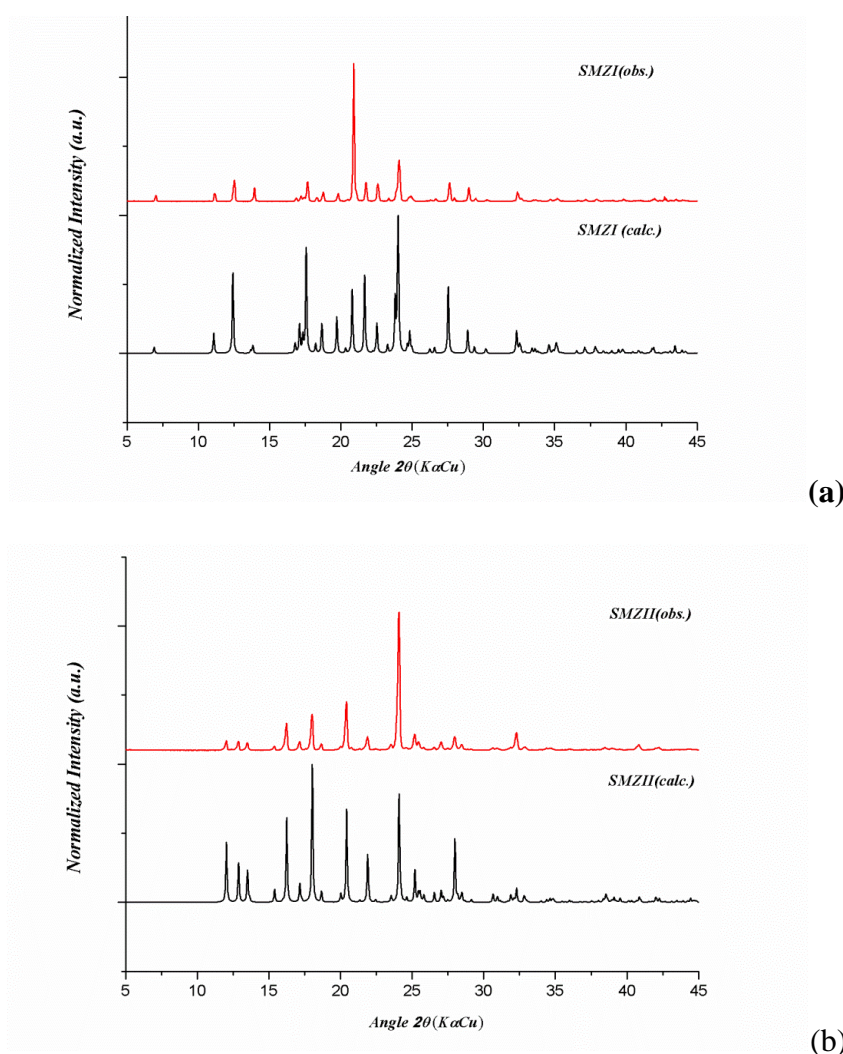

Figure S1. Direct comparison between PXRD profile calculated from single crystal data (CCDC code: SLFNMB01<sup>[12]</sup> for SMZI and SLFNMB02<sup>[12]</sup> for SMZII) and experimental for SMZI(a) and SMZII(b).

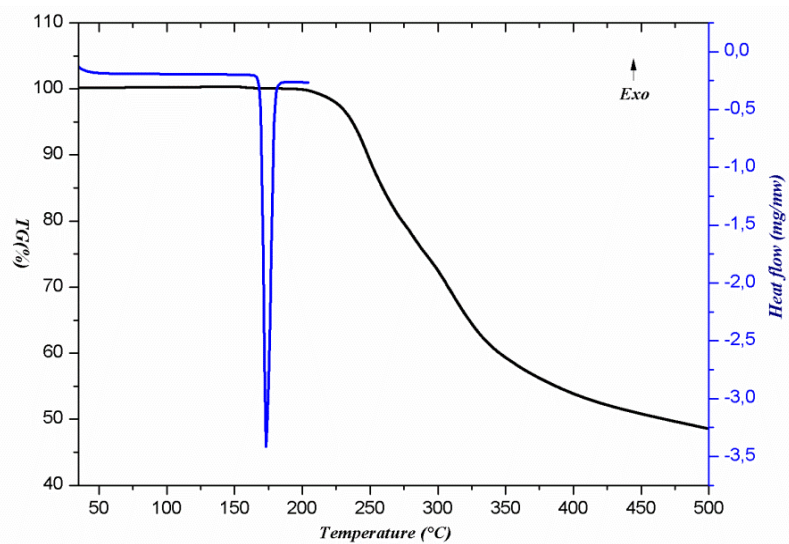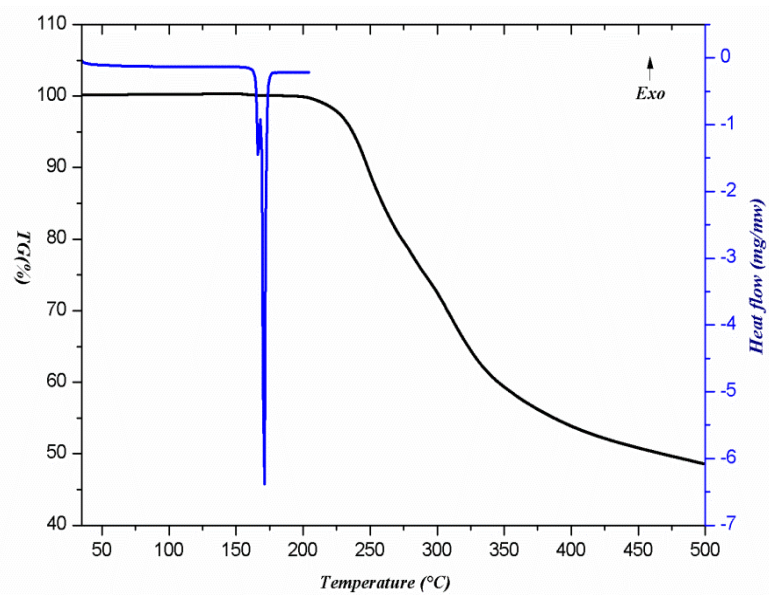

Figure S2. TG/DTA curves of solid forms (a) SMZI and (b) SMZII.

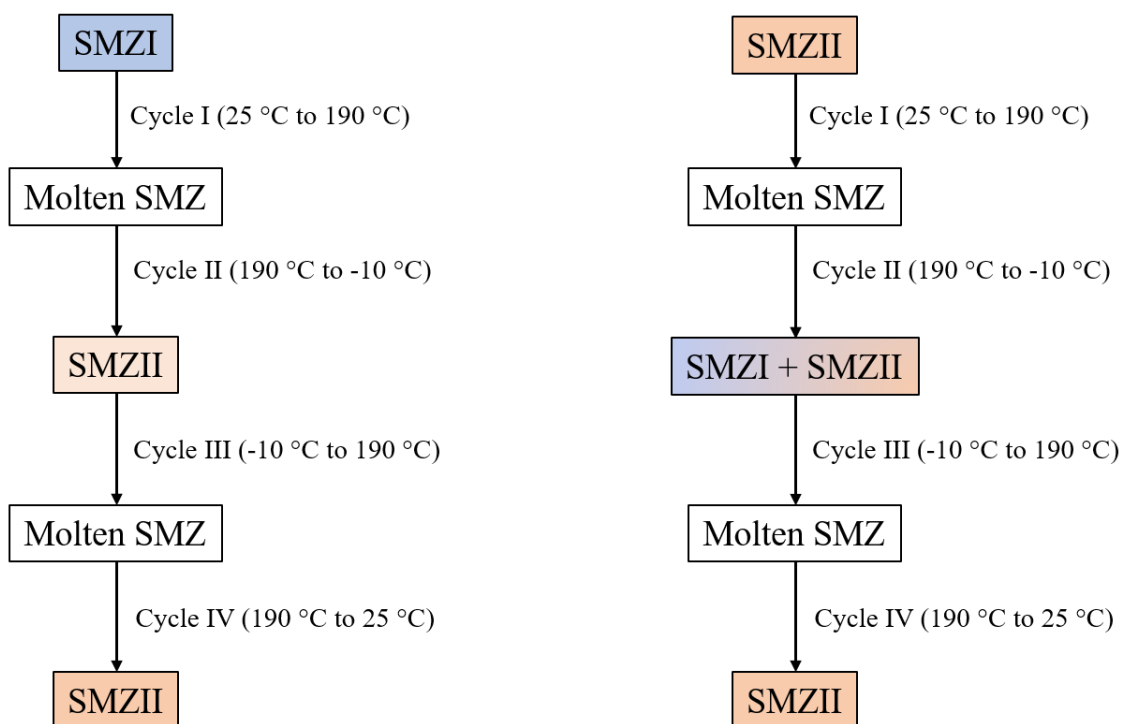

Figure S3. Scheme of heat-cool-heat protocol (B), evidencing the SMZII as final residual material.

Table S1. Hydrogen bond distances ( $\text{\AA}$ ) and angles ( $^\circ$ ), for SMZI. Data extracted from SLFNMB01 CIF file.

|                   | d D $\cdots$ A | d D–H | $\angle$ D–H $\cdots$ A |
|-------------------|----------------|-------|-------------------------|
| N1–H1 $\cdots$ O2 | 3.320          | 0.829 | 140.62                  |
| N1–H2 $\cdots$ O2 | 3.286          | 0.855 | 151.68                  |
| N2–H3 $\cdots$ O1 | 3.240          | 0.855 | 170.48                  |
| C8–H8 $\cdots$ N3 | 3.239          | 0.882 | 154.91                  |

D = donor; A = acceptor

Table S2. Hydrogen bond distances (Å) and angles (°), for SMZII. Data extracted from SLFNMB02 CIF file.

|            | d D...A | d D-H | <D-H...A |
|------------|---------|-------|----------|
| N1-H1...O1 | 3.124   | 1.000 | 167.95   |
| N1-H2...O2 | 2.997   | 0.902 | 166.87   |
| N2-H3...N3 | 2.937   | 0.901 | 163.82   |

D = donor; A = acceptor
